# Supplementary material for: Priming conditions shape breadth of neutralizing antibody responses to sarbecoviruses
Source: Research Square preprint supplement (doi:10.21203/rs.3.rs-1790314/v1), 2022-07-05
Supplement: Supplementary file 1 [file 7eb665d6a8c30c0173fb0484.pdf]

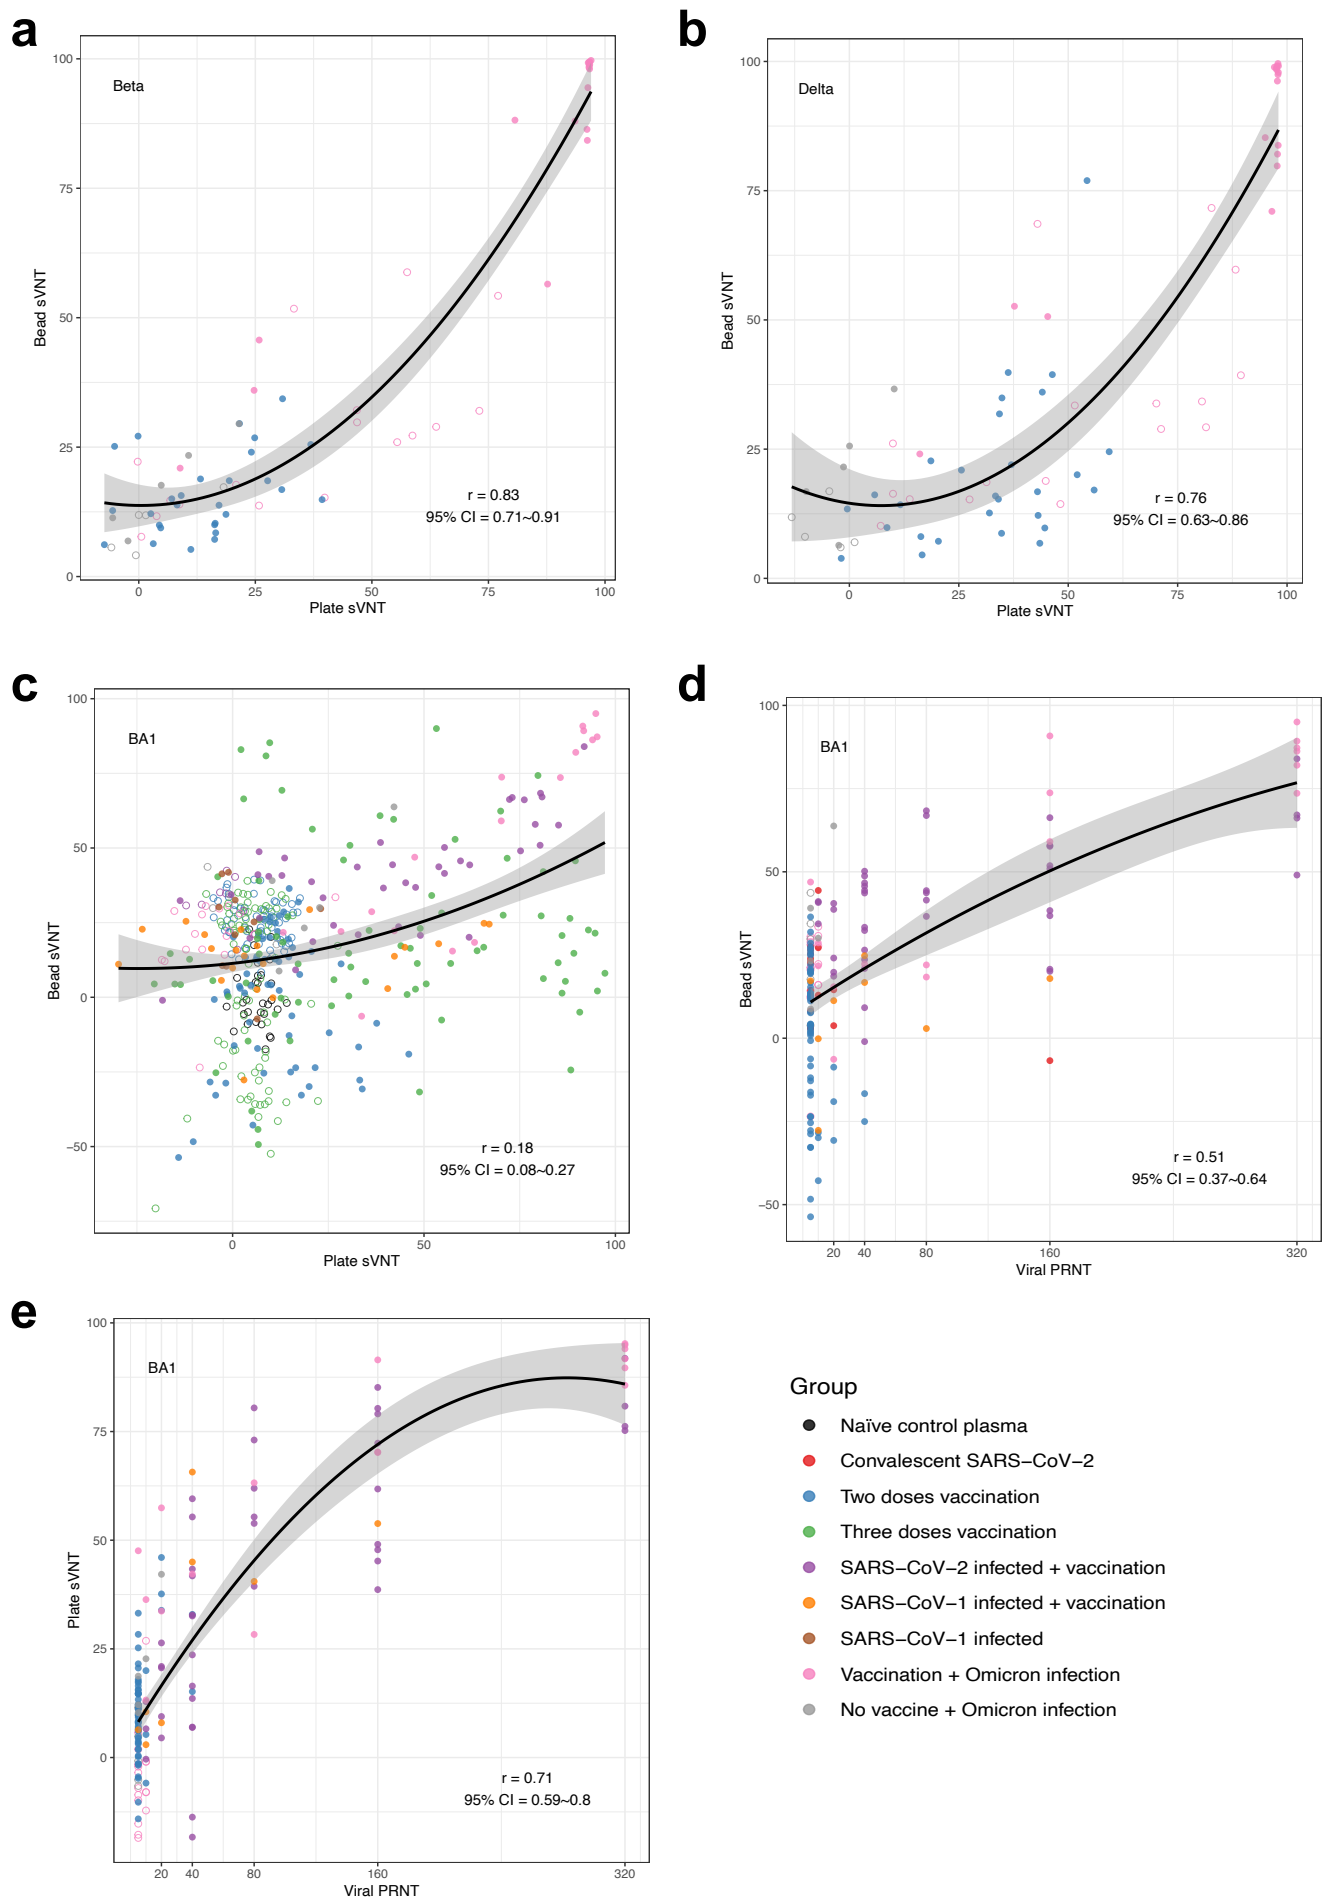

**Supplementary Figure 1: sVNT VoC plate versus bead-based multiplex.** Spearman correlation analysis ( $r$ ) analysis of sVNT by commercial plate versus multiplex bead-based assays for SARS-CoV-2 VoC (a) Beta, (b) Delta, and (c) BA.1 Omicron. Omicron results were correlated for PRNT vs bead-based sVNT (d) and plate based sVNT (e). Data represents the mean (bold line), 95% CI (grey shaded), and individual data (open circles for pre/acute samples, closed circles for post vaccination/recovered).
